# Supplementary material for: The dilatable membrane of oleosomes (lipid droplets) allows their in vitro resizing and triggered release of lipids
Source: Royal Society of Chemistry journal article supplement (doi:10.1039/d3sm00449j), 2023-01-01
Supplement: d3sm00449j1.pdf [file d3sm00449j1.pdf]

## 1 **Appendix A: Supplementary material**

### 2 **Composition analysis**

3 To determine the moisture content of the recovered purified oleosomes, samples (~1.00 g)  
4 were dried at 60°C until reaching a stable weight (24 hrs). The samples cooled down to room  
5 temperature in a glass desiccator (Duran, Wertheim/Main, Germany) for 30 min. The moisture  
6 content (wt.%) was calculated based on the weight loss after drying.

7 The lipid content (LC) of the oleosomes was calculated on a dry-matter weight basis using  
8 Soxhlet extraction. The lipids were extracted for 7 hrs with petroleum ether (40-60°C) as a  
9 solvent. The lipid content after extraction was calculated using:

$$10 \quad LC \text{ (wt\%)} = 100 * \left( \frac{M_o}{M} \right)$$

11 **Equation 1S**

12 where  $M_o$  [g] is the mass of the extracted TAGs.

13 The protein content (PC) of the recovered purified oleosomes on dry-matter weight basis was  
14 determined using the dumas method (FlashEA 1112 Series, Thermo Scientific, Waltham,  
15 Massachusetts, US); d-methionine ( $\geq 98\%$ , Sigma Aldrich, Darmstadt, Germany) was used as a  
16 standard and as a control. Cellulose (Sigma Aldrich, Darmstadt, Germany) served as blank. A  
17 nitrogen–protein conversion factor of 5.7 (calculated based on amino acid sequence) was used  
18 and the protein content was calculated using:

$$19 \quad PC \text{ (wt\%)} = 100 * \left( \frac{NC * 5.7}{M} \right)$$

20 **Equation 2S**

21 where PC is the protein content, NC is the nitrogen content, and M is the mass of the dry sample.

22

### 23 **Electrophoresis (SDS-PAGE)**

24 The protein profile of the proteins in purified oleosomes was determined with SDS-PAGE. The  
25 samples were analyzed under non-reducing and reducing conditions. Reducing agent (NuPAGE  
26 ® Sample Reducing Agent) was added to break disulphide bonds in napin and cruciferin chains,  
27 enabling the detection of their presence. The samples were prepared as follows:

28 - 100 µL sample with a protein concentration of 3.3 mg/mL on average.

29 - 250 µL NuPAGE ® LDS sample buffer

30 - 100 µL NuPAGE ® Sample Reducing Agent or deionized water

31 - 550 µL deionized water

32 The samples were vortexed and then centrifuged for one minute at 2000 rpm to eliminate  
33 undissolved material. Subsequently, samples were heated in a heating block (Eppendorf  
34 Thermomixer C, Eppendorf Nederland B.V., Nijmegen, the Netherlands) for 10 minutes at  
35 70°C to denature the proteins. Samples were centrifuged at the same settings again.

36 18 µL of sample were loaded in a NuPAGE Novex® (by Thermo Fischer SCIENTIFIC,  
37 Waltham, USA) gel (4-12% Bis-Tris, 1.0mm, 12 wells), submersed in a NuPAGE® MES SDS  
38 running buffer. 10 µL of a PageRuler™ Plus prestained protein ladder (10-250 kDa) was  
39 loaded. The gels ran for a minimum of 35 minutes at a constant 200 V in a Mini Gel Tank  
40 (Invitrogen by Fischer Scientific, Waltham, USA).

41 Subsequently, the gels were rinsed three times with demi-water and stained with Coomassie  
42 Brilliant Blue R-250 staining solution for 50 minutes while gently shaking at room temperature.

43 The gels were rinsed three times with demi-water and destained with washing buffer (10 wt%  
44 ethanol and 7.5 wt% acetic acid in deionized water) for a minimum of two hours at room

45 temperature. Afterwards, the gels were stored at room temperature in demi-water filled plastic  
46 boxes. The lids were covered with aluminum foil to prevent light degradation of the bands.

47

## 48 **Results on characterization of purified rapeseed oleosomes**

### 49 **Protein profile**

50 To evaluate the purity of the obtained oleosomes the protein profile was analyzed using  
51 electrophoresis (SDS-PAGE). The electrophoregram (**Figure 1**) shows the protein profile of the  
52 oleosomes under non-reducing conditions. The oleosins (15-17 kDa), caleosins (20-27 kDa)  
53 and steroleosins (40-55 kDa) appeared to constitute the majority of proteins present. Above 115  
54 kDa some undefined bands were present, which may have been a slight carry-over of  
55 enzymes[15]. Almost no bands related to storage rapeseed proteins (napins and cruciferins)  
56 were present, indicating a relatively pure system.

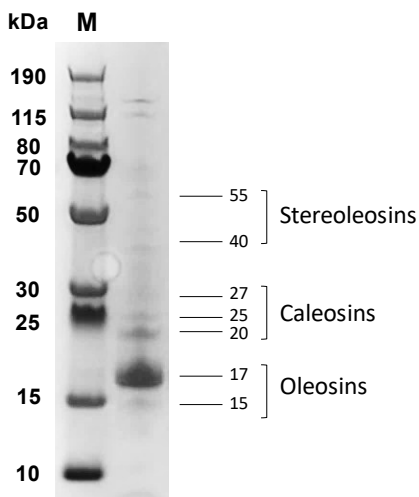

57

58 **Figure 1S.** Protein profile of purified oleosomes under non-reducing conditions. M: protein  
59 molecular weight marker.

60

61 **Molecular dynamic simulations**

62 **Table 1S** Measured radii ( $r$ ) PL per Area ( $\text{nm}^2$ ) of oleosome-like droplets and Area ( $\text{nm}^2$ ) per  
63 PL of oleosome-like droplets of 1200-2000 DPPC molecules per oleosome before and after  
64 fusion.

| <b>Droplet</b>      | <b>r [nm]</b> | <b>PL/<math>\text{nm}^2</math></b> | <b><math>\text{nm}^2</math>/PL</b> |
|---------------------|---------------|------------------------------------|------------------------------------|
| Triolein assembly   | 10.3          | -                                  | -                                  |
| Oleosome-1200       | 11.3          | 0.7                                | 1.34                               |
| Oleosome-1600       | 11.6          | 0.9                                | 1.06                               |
| Oleosome-2000       | 12.0          | 1.1                                | 0.90                               |
| Oleosome-1200 fused | 13.6          | 0.52                               | 1.93                               |
| Oleosome-1600 fused | 13.8          | 0.67                               | 1.50                               |
| Oleosome-2000 fused | 14.2          | 0.79                               | 1.27                               |

65

66

67
